# Supplementary material for: pDobz/pDobb protected diaminodiacid as a novel building block for peptide disulfide-bond mimic synthesis
Source: Royal Society of Chemistry journal article supplement (doi:10.1039/c8ra09761e), 2019-01-01

# Supporting Information

## **pDobz/pDobb Protected Diaminodiacid as Novel Building Block for Peptide Disulfide-bond Mimics Synthesis**

**Chao Liu<sup>a</sup>, Yan Zou<sup>a</sup>, Honggang Hu<sup>a</sup>, Yunyun Jiang<sup>\*b</sup>, Luping Qin<sup>\*ac</sup>**

*Email:* Shygm98@163.com (Yunyun Jiang); qinsmmu@126.com (Luping Qin)

- a) College of Pharmacy, Second Military Medical University, 325 Guohe Road, Shanghai, 200433, China*
- b) Department of Pharmacy, No.101 Hospital of PLA, Wuxi 214044, China*
- c) College of Pharmaceutical sciences, Zhejiang Chinese Medical University, Gaoke Road, Fuyang District, Hangzhou 311402, China*

# 1. Experimental Section

## 1.1 Synthesis of contryphan-Vn

To investigate reduction stability and protease stability, we synthesized the native model peptide contryphan-Vn shown in Scheme S1.

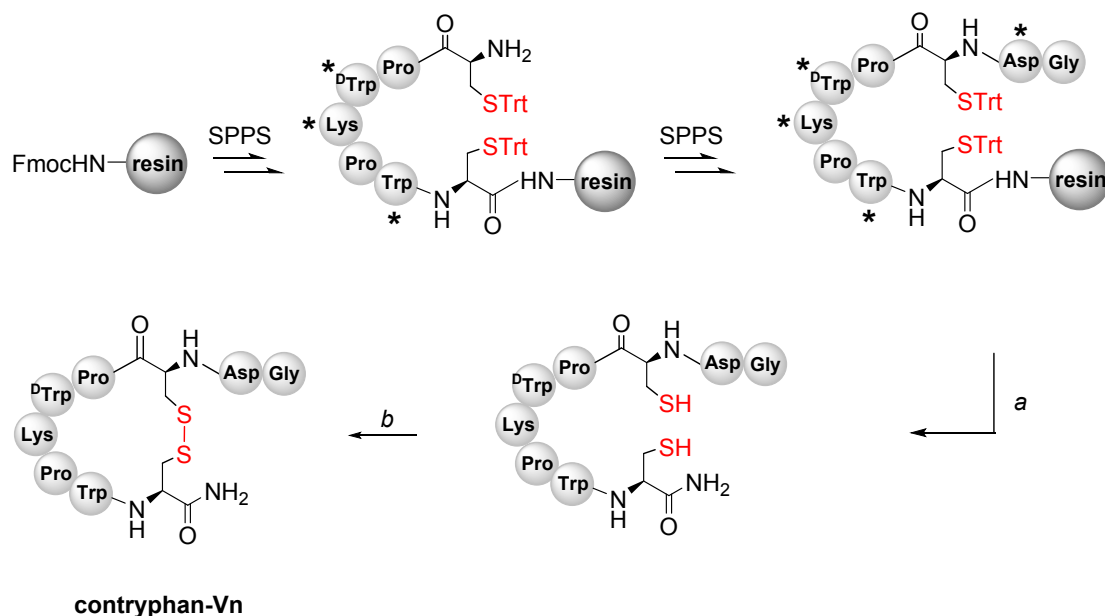

**Scheme S1.** Route of synthesis of contryphan-Vn; reagents and conditions: a) TFA/EDT/TIPs/water (95:2:2:1, *v/v/v/v*), rt, 2 h; b) Guanidine hydrochloride, sodium dihydrogen phosphate, PBS buffer (containing 10% DMSO), rt, 24 h; The resin-bound peptides were protected on side chains at asterisk sites. The following protecting groups for amino acid side chains were used: tert-butyl (tBu; for Asp), trityl (Trt; for Cys) and tert-butyloxycarbonyl (Boc; for Lys and Trp).

## 1.2 Characterization of contryphan-Vn

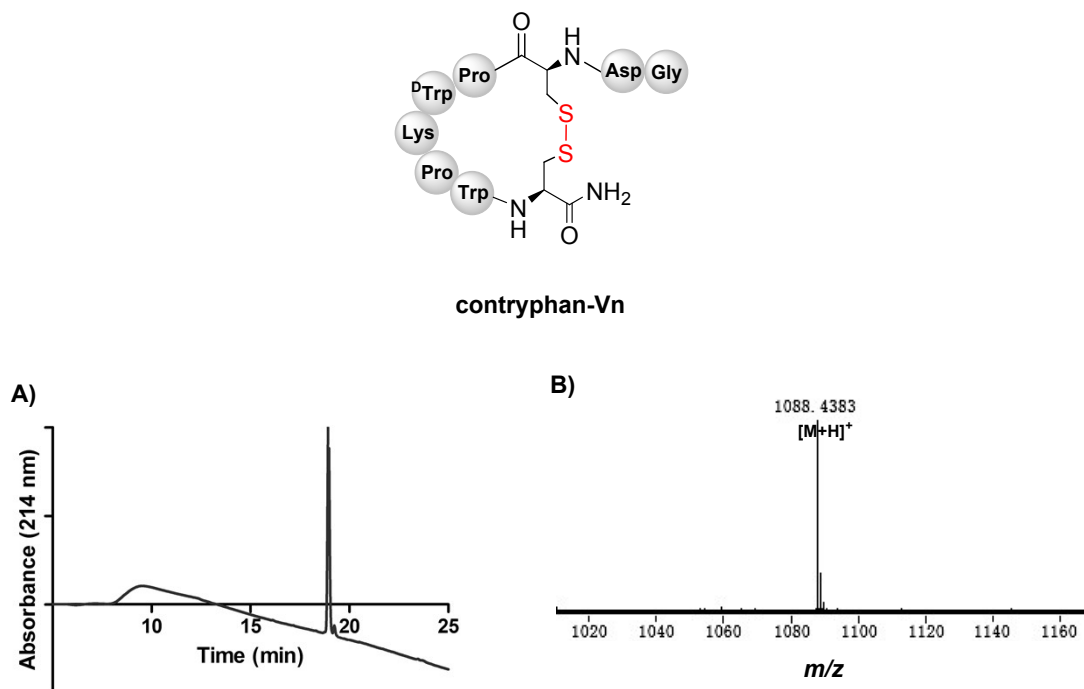

**Figure S1.** Contryphan-Vn was obtained as a white powder (46.8 mg, 43% yield according to initial resin load, 97.2% purity). a) HPLC trace of purified contryphan-Vn. Gradient: 90-0% of buffer B in 25 min with C18 column (5  $\mu$ m, 4.6 $\times$ 250 mm). b) HR-MS spectrum of contryphan-Vn (calc. for C<sub>50</sub>H<sub>65</sub>N<sub>13</sub>O<sub>11</sub>S<sub>2</sub> 1087.4368, found [M+H]<sup>+</sup> 1088.4383).

## 2. HRMS data of small molecular compounds

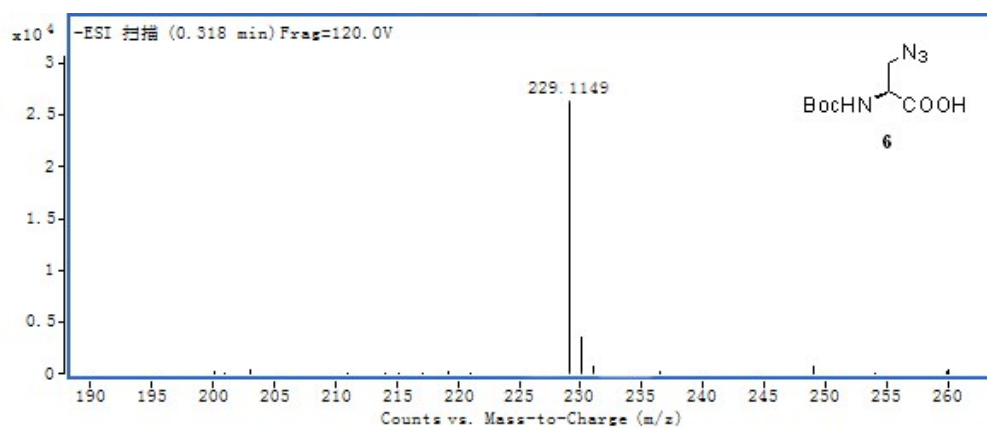

Figure

Figure S2. HR-MS spectrum of compound 6 (calc. for C<sub>8</sub>H<sub>14</sub>N<sub>4</sub>O<sub>4</sub> 230.1015, found [M-H]<sup>-</sup> 229.1149).

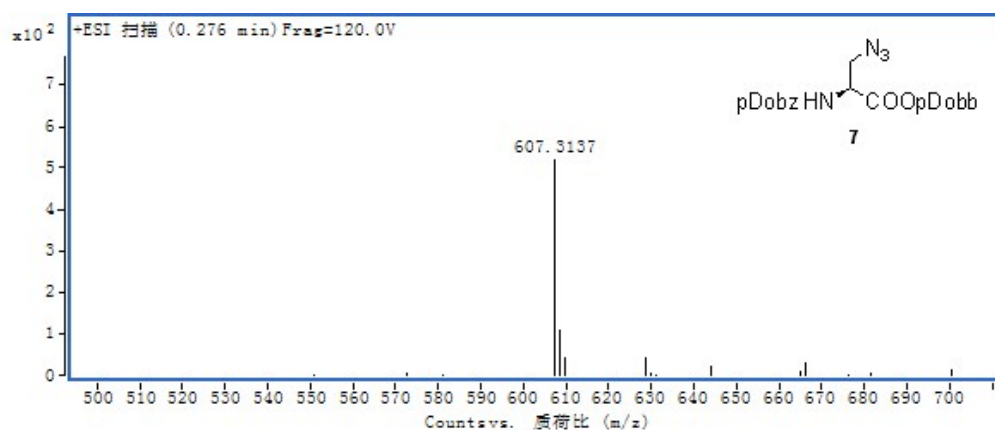

Figure

Figure S3. HR-MS spectrum of compound 7 (calc. for C<sub>30</sub>H<sub>40</sub>B<sub>2</sub>N<sub>4</sub>O<sub>8</sub> 606.3032, found [M+H]<sup>+</sup> 607.3137).

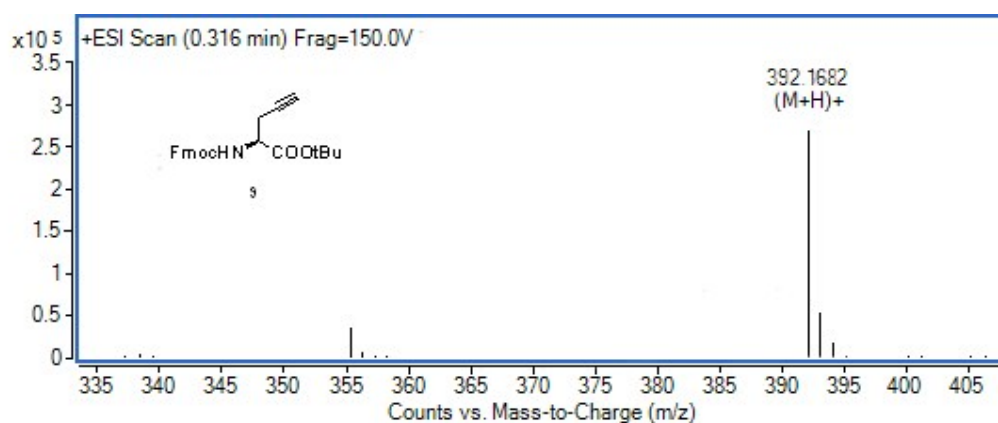

Figure

Figure S4. HR-MS spectrum of compound 9 (calc. for C<sub>24</sub>H<sub>25</sub>NO<sub>4</sub> 391.1784; found [M+H]<sup>+</sup> 392.1682).

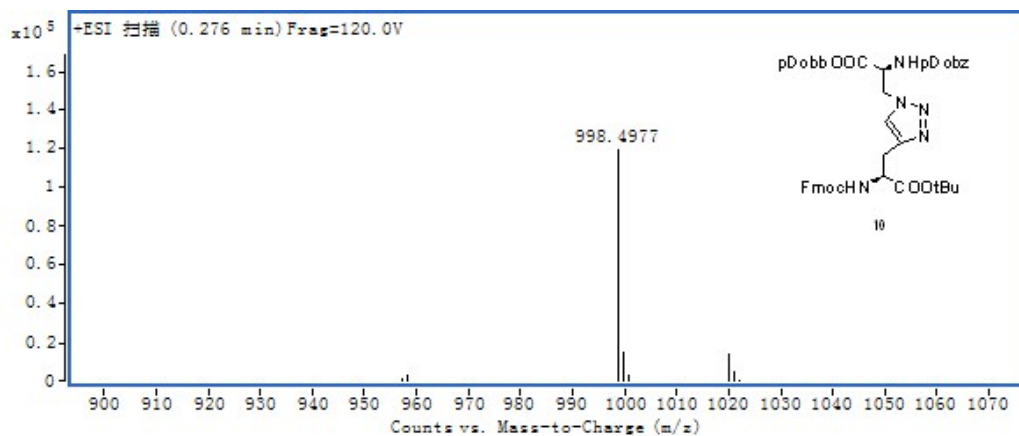

Fig

Figure S5. HR-MS spectrum of compound 10 (calc. for C<sub>54</sub>H<sub>65</sub>B<sub>2</sub>N<sub>5</sub>O<sub>12</sub> 997.4816; found [M+H]<sup>+</sup> 998.4977).

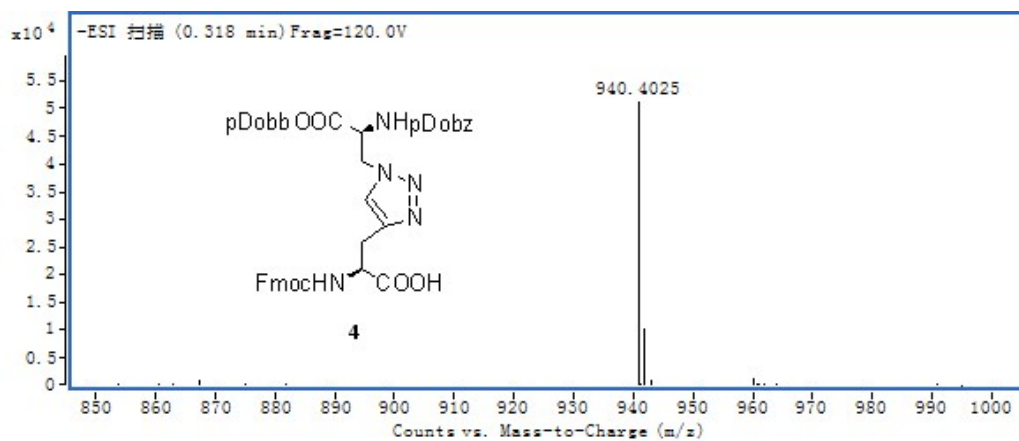

Fi

Figure S6. HR-MS spectrum of compound 4 (calc. for C<sub>50</sub>H<sub>57</sub>B<sub>2</sub>N<sub>5</sub>O<sub>12</sub> 941.4190; found [M-H]<sup>-</sup> 940.4025).

### 3. $^1\text{H}$ and $^{13}\text{C}$ NMR spectra of compounds

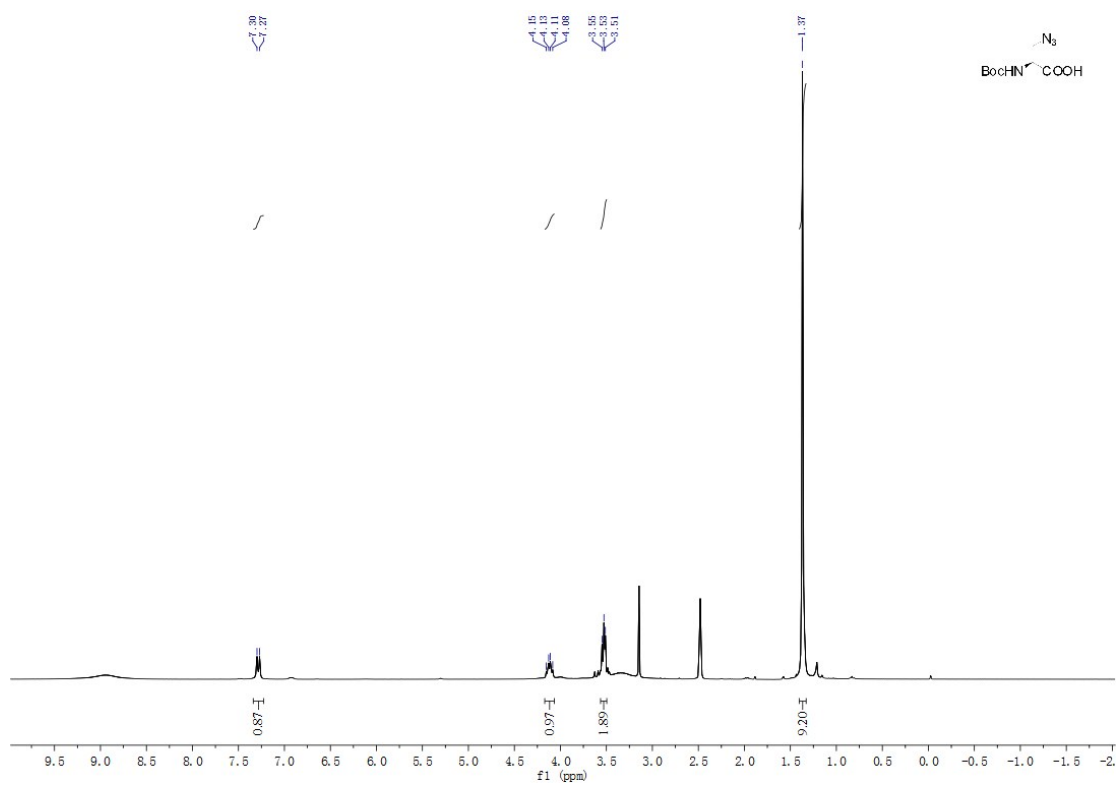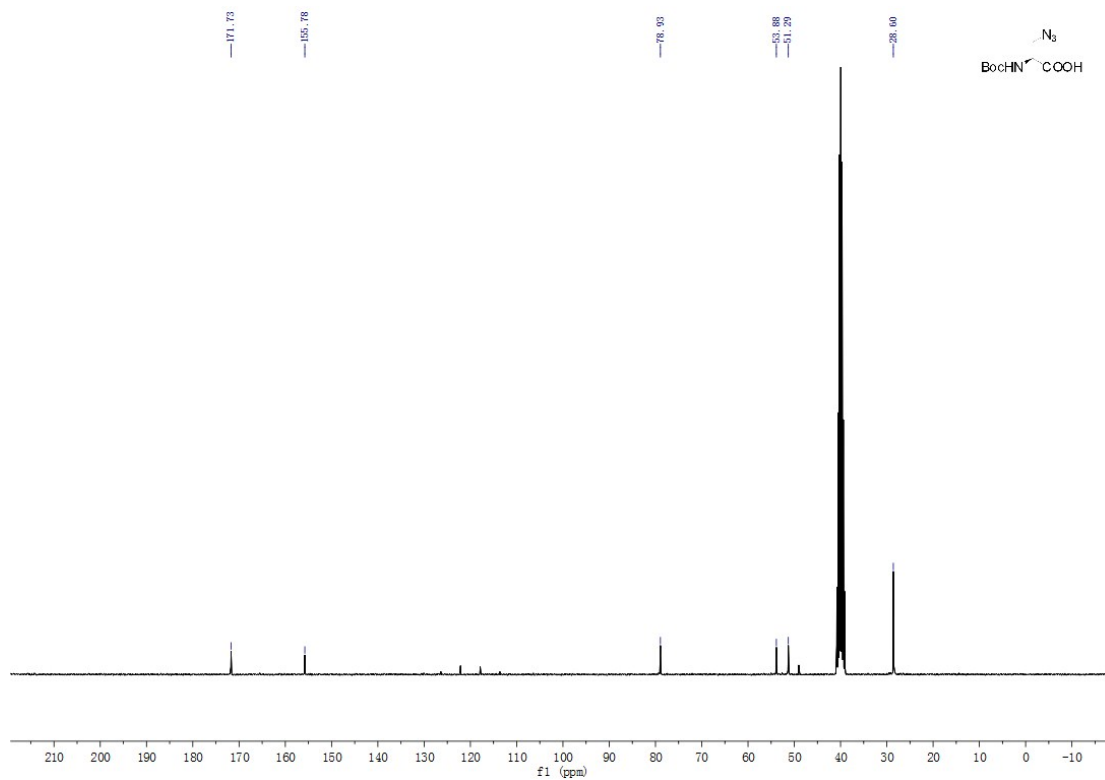

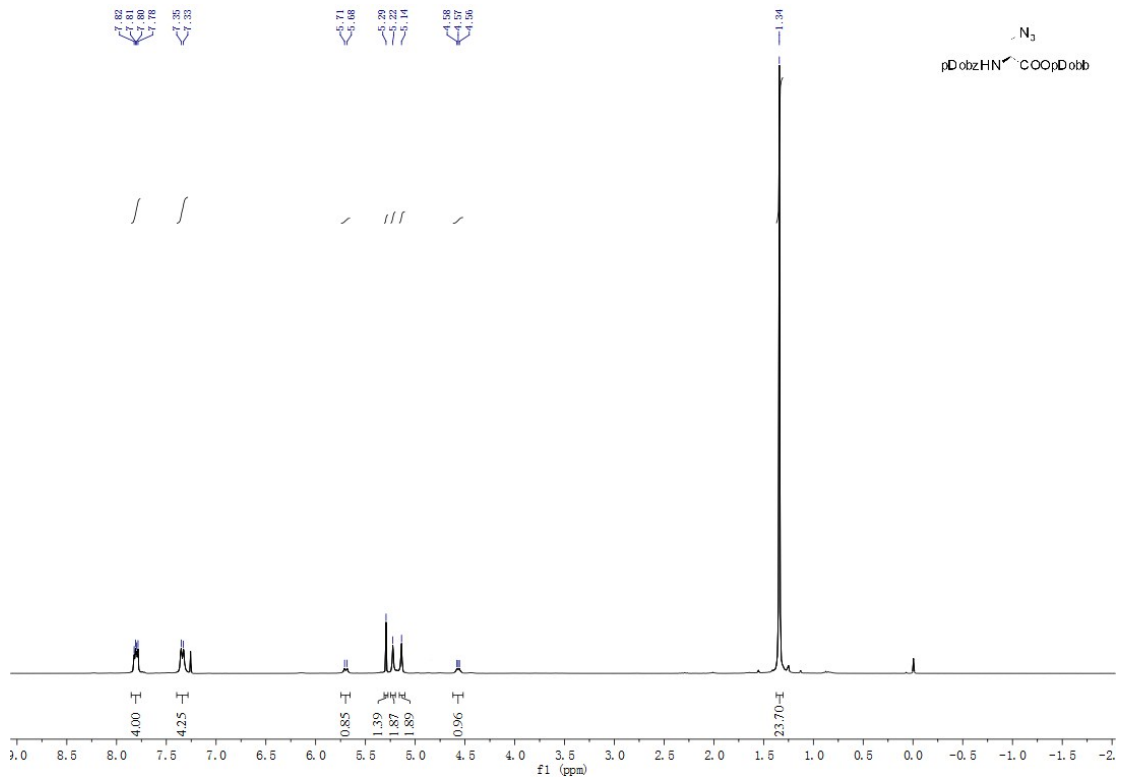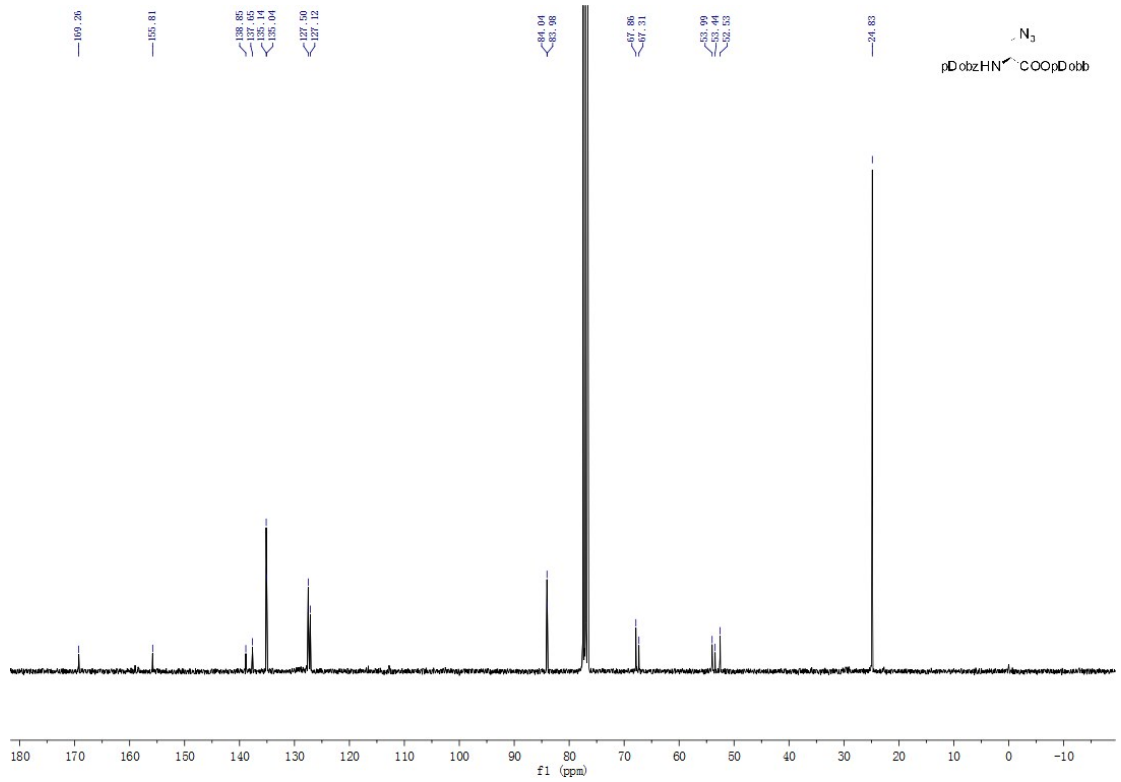

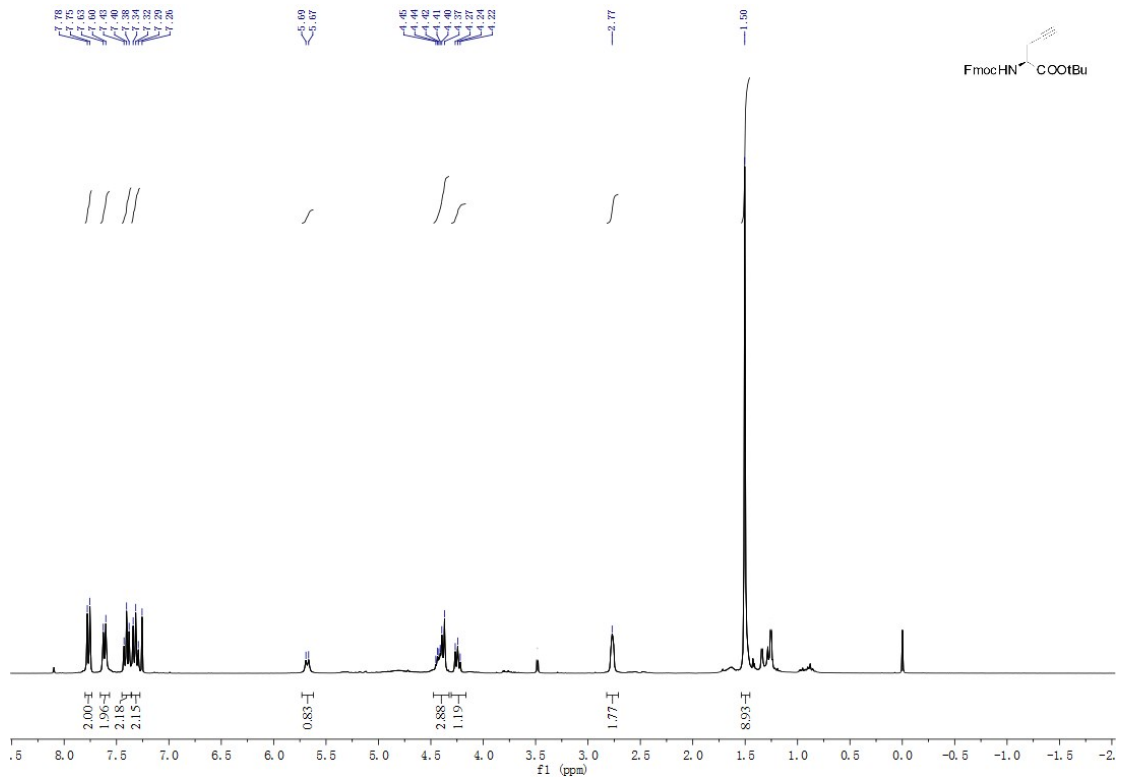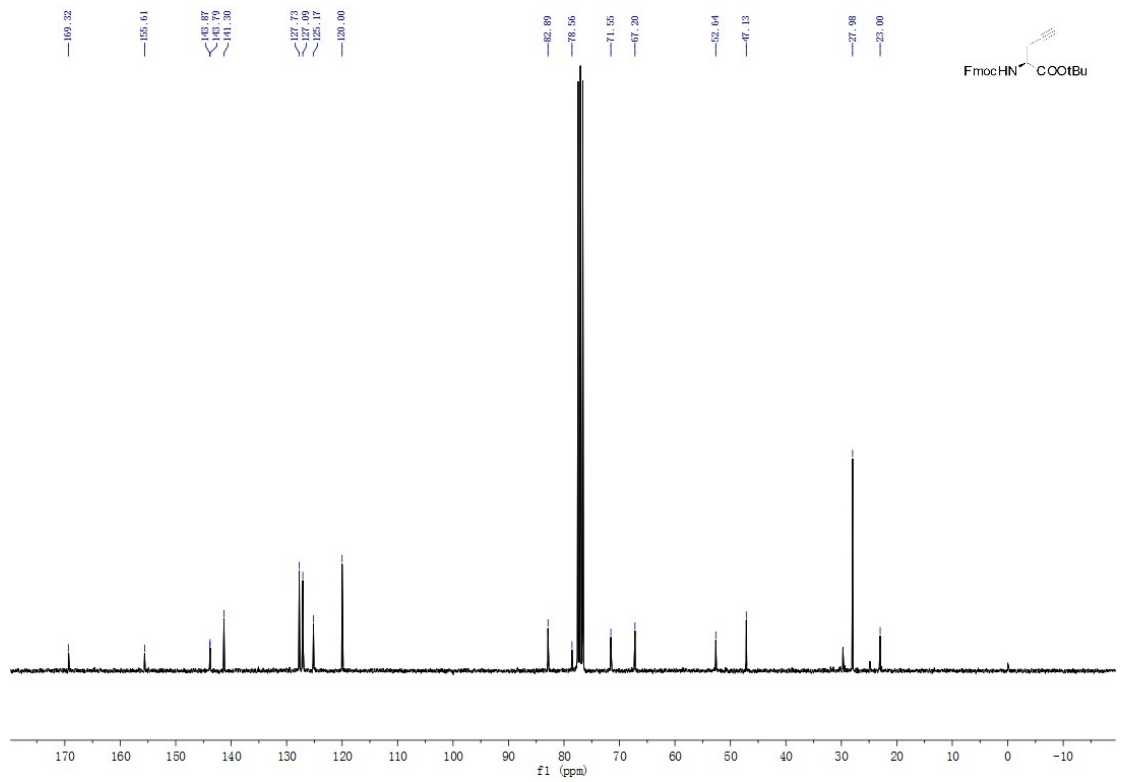



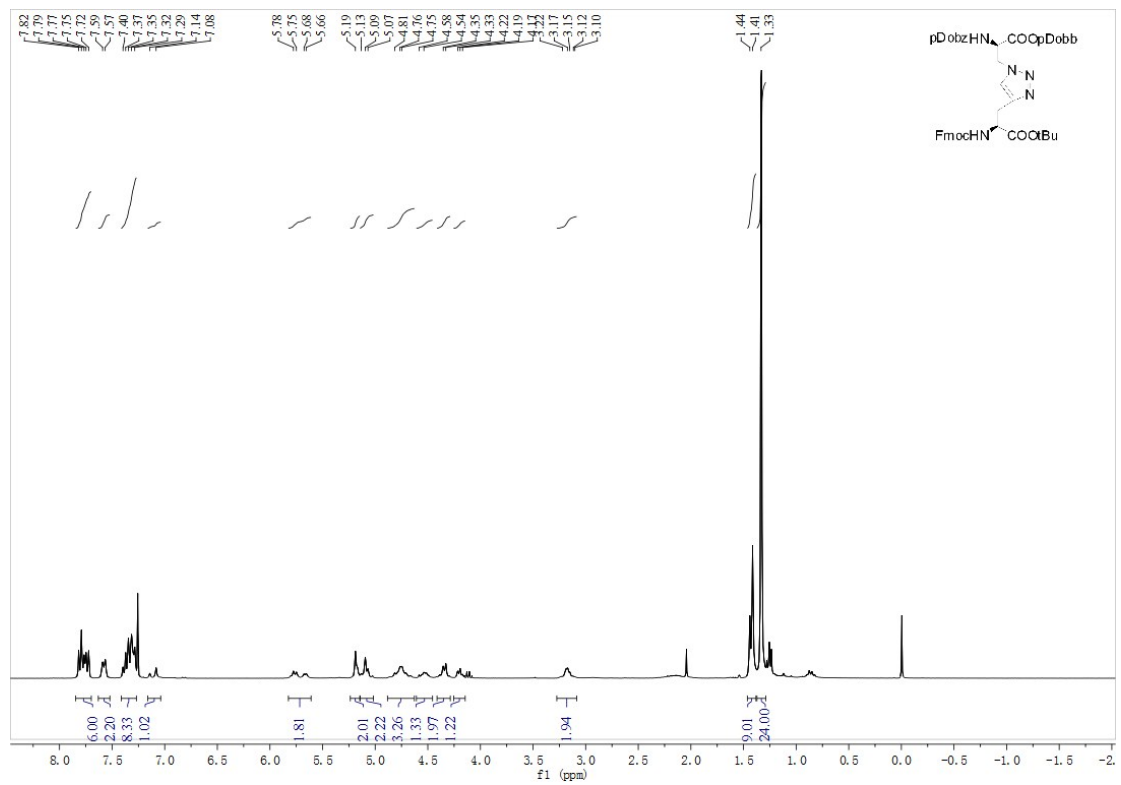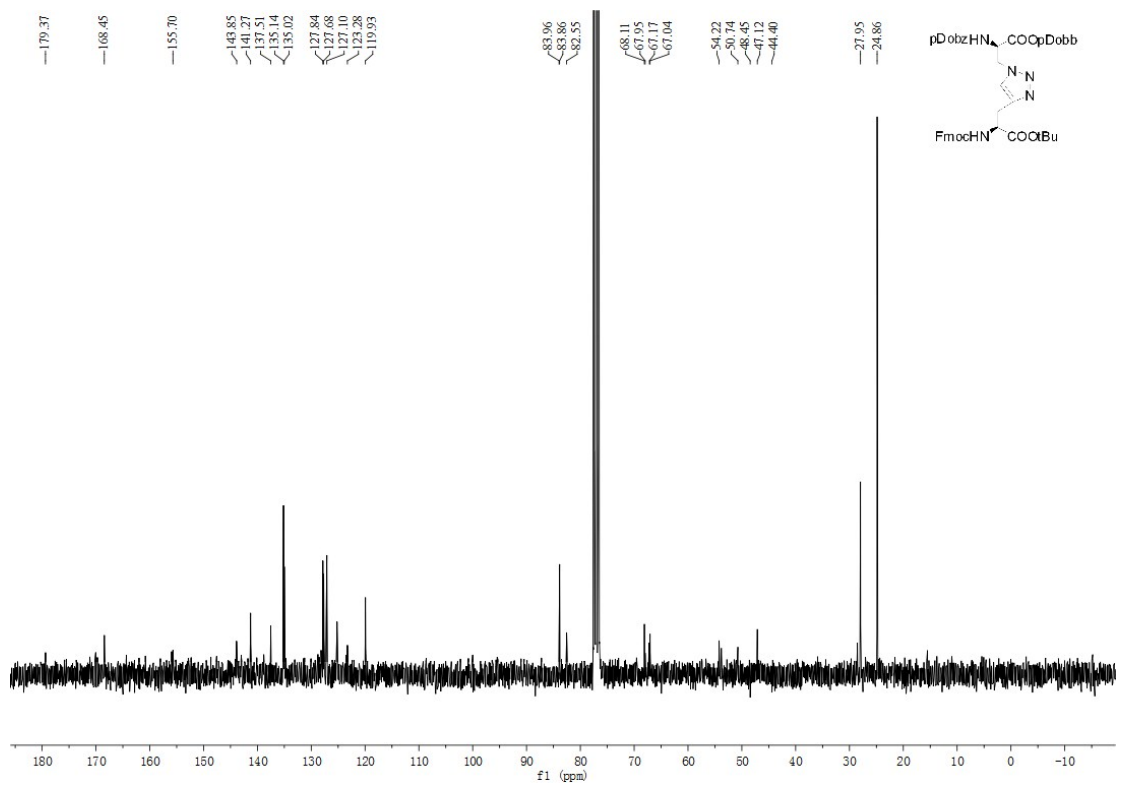

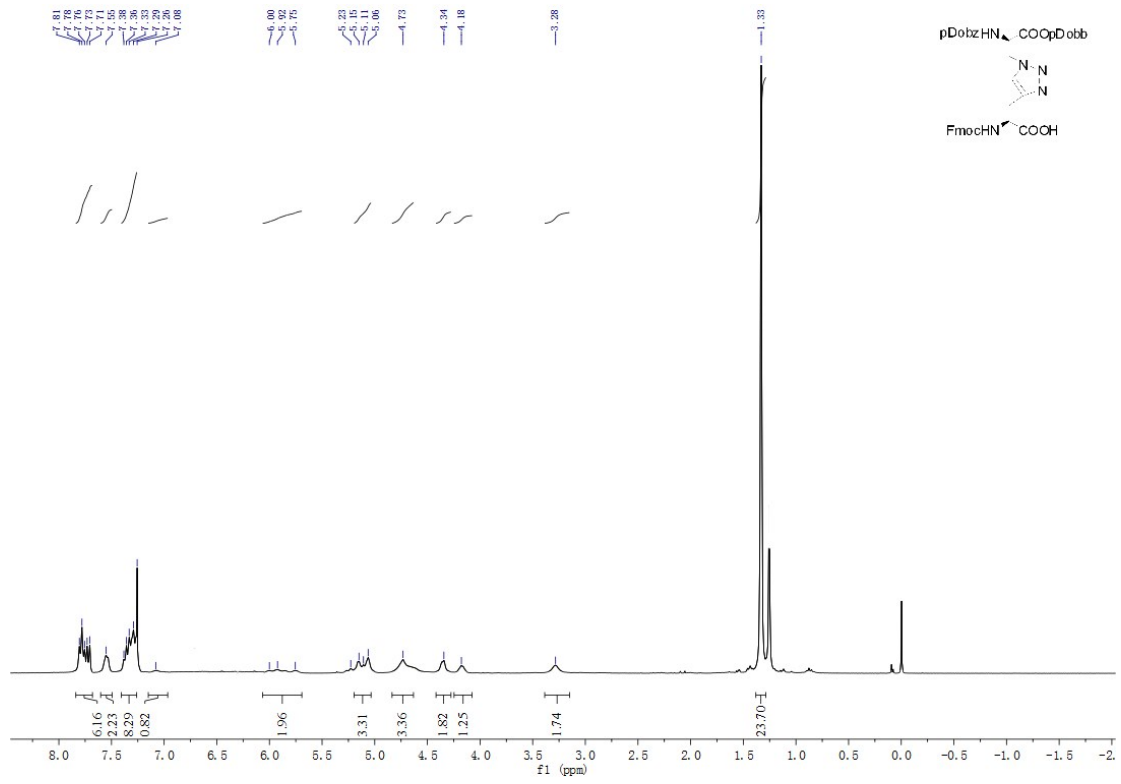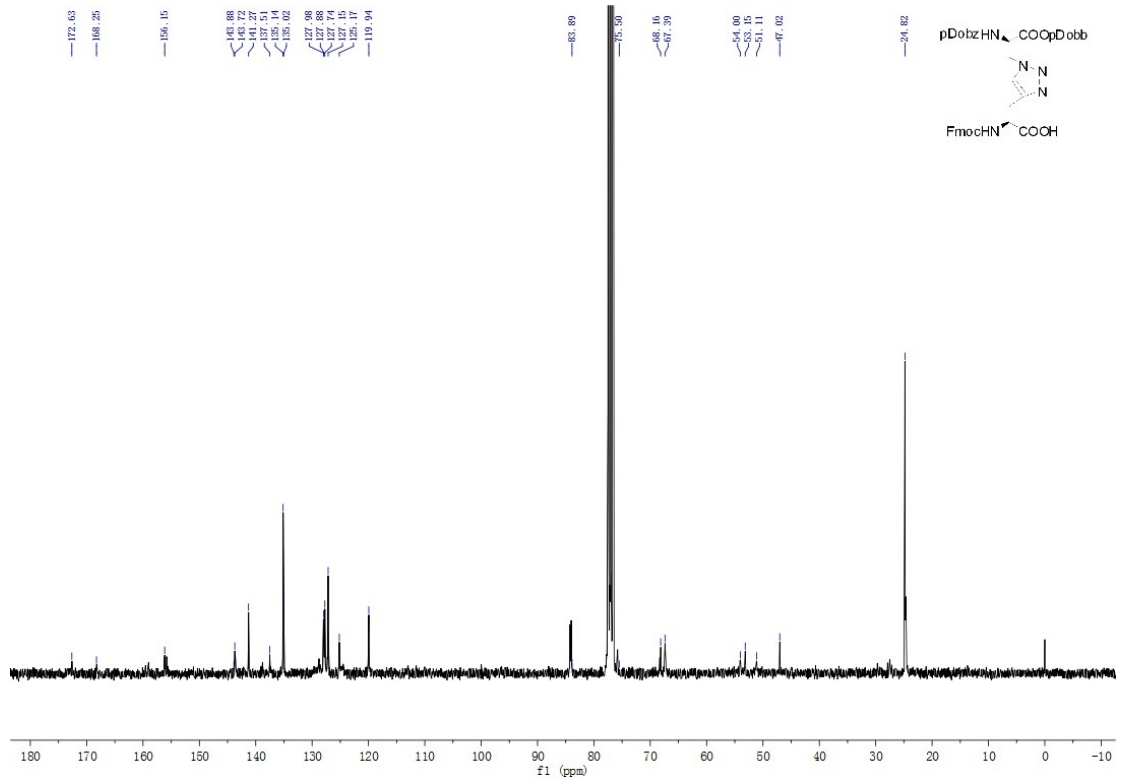

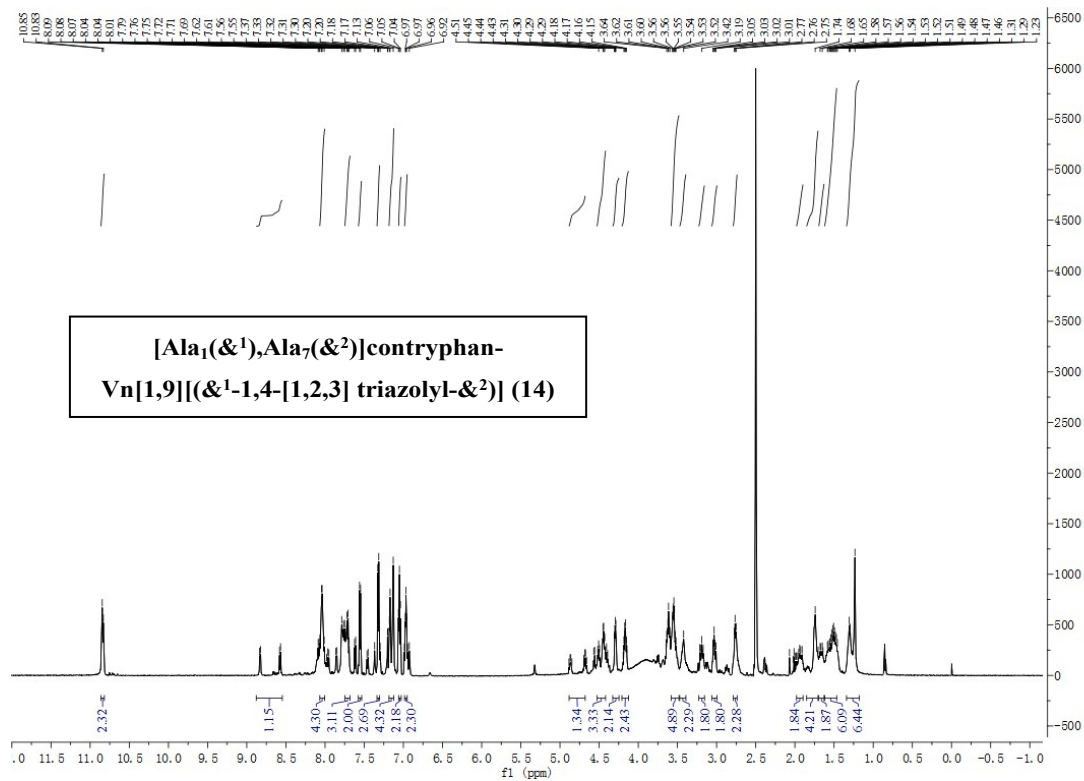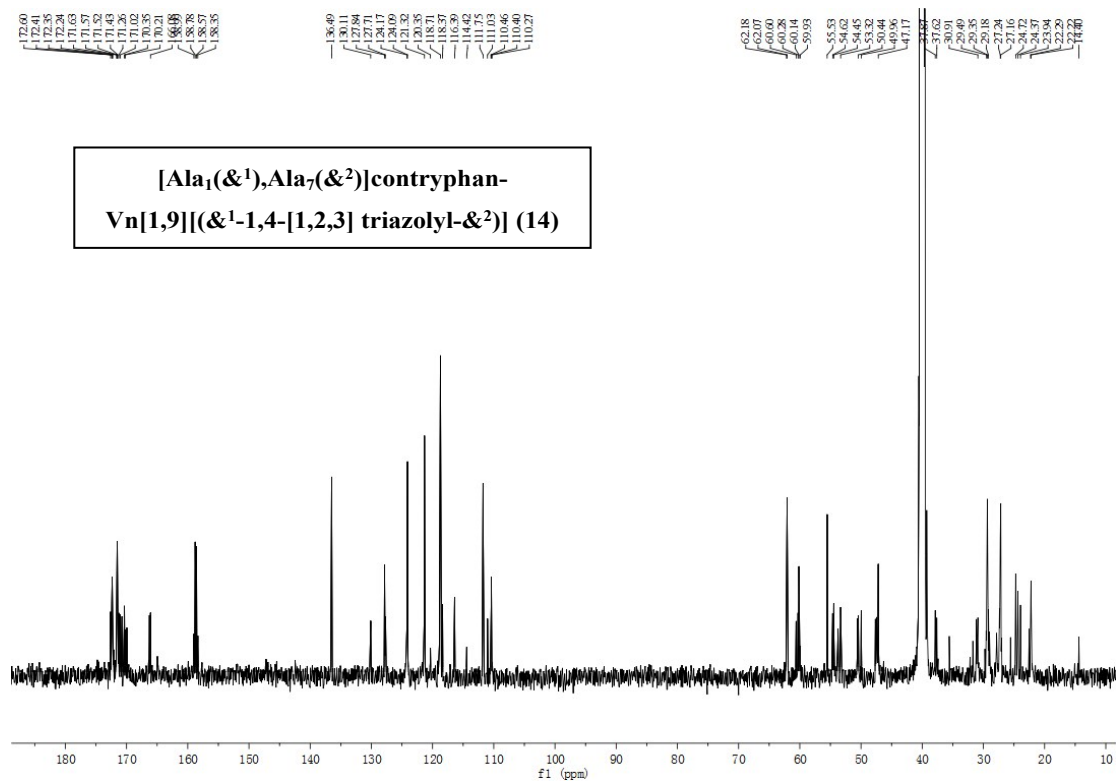

Supplement: c8ra09761e1.pdf [file c8ra09761e1.pdf]
